# Supplementary material for: Catalytic production of tetrahydropyran (THP): a biomass-derived, economically competitive solvent with demonstrated use in plastic dissolution
Source: Royal Society of Chemistry journal article supplement (doi:10.1039/d2gc03475a), 2022-01-01
Supplement: d2gc03475a1.pdf [file d2gc03475a1.pdf]

## Supporting Information

### Catalytic production of Tetrahydropyran (THP): A biomass-derived, economically competitive solvent with demonstrated use in plastic dissolution

Raka G. Dastidar,<sup>a</sup> Min Soo Kim,<sup>a</sup> Panzheng Zhou,<sup>a</sup> Zaneta Luo,<sup>a</sup> Changxia Shi,<sup>b</sup> Kevin J. Barnett,<sup>c</sup> Daniel J. McClelland,<sup>c</sup> Eugene Y.-X. Chen,<sup>b</sup> Reid C. Van Lehn,<sup>a</sup> George W. Huber<sup>a,\*</sup>

<sup>a</sup>Department of Chemical and Biological Engineering, University of Wisconsin, 1415 Engineering Drive, Madison, Wisconsin 53706, USA

<sup>b</sup>Department of Chemistry, Colorado State University, Fort Collins, CO 80523, USA

<sup>c</sup>Pyran Inc., 505 South Rosa Road, Suite 112, Madison, Wisconsin 53719, USA

\*Corresponding author: [gwhuber@wisc.edu](mailto:gwhuber@wisc.edu)

Number of pages: 9

Number of figures: 4

Number of tables: 4

### Catalyst characterization

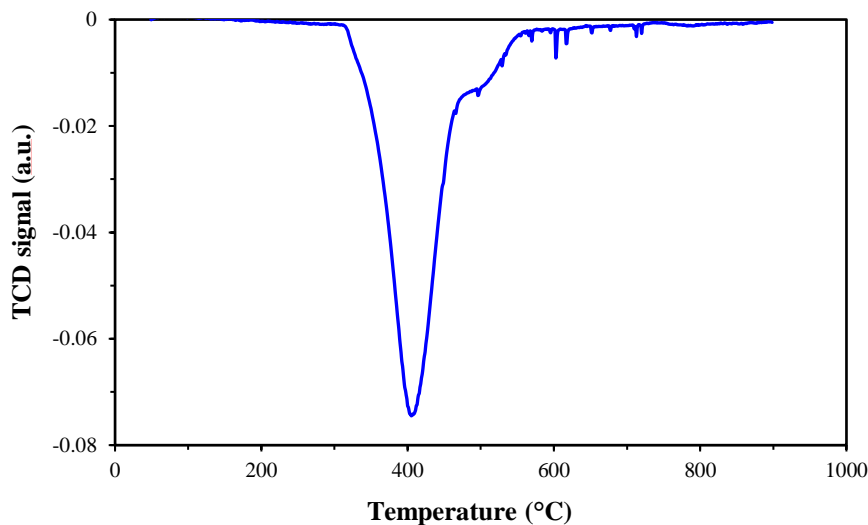

**Figure S1.** Temperature-programmed reduction (TPR) of 10-Ni/SiO<sub>2</sub> in H<sub>2</sub> flow. Experiment carried out on Micromeritics Autochem II chemisorption analyzer with a thermal conductivity detector (TCD).

## **Ring opening polymerization:**

### **Materials**

Tetrahydrofuran (THF) was purified and dried prior polymerization. High-performance liquid chromatography (HPLC)-grade THF were first sparged extensively with nitrogen during filling 20 L solvent reservoirs and then dried by passage through activated alumina followed by passage through Q-5 supported copper catalyst stainless steel columns. Tetrahydropyran (THP) was purchased from TCI America. THP was degassed and dried over CaH<sub>2</sub> overnight, followed by vacuum distillation (CaH<sub>2</sub> was removed before distillation), and then stored over activated Davison 4 Å molecular sieves. Boron trifluoride diethyl etherate (BF<sub>3</sub>·Et<sub>2</sub>O) and ytterbium(III) trifluoromethanesulfonate (Yb(OTf)<sub>3</sub>) were purchased from Sigma-Aldrich Chemical Co. and used as received. Trifluoromethanesulfonic acid (CF<sub>3</sub>SO<sub>3</sub>H) was purchased from TCI America and used as received.

### **Nuclear magnetic resonance (NMR) spectroscopy**

<sup>1</sup>H spectra were recorded on a Bruker Advance NEO 400 MHz. Chemical shifts for all spectra were referenced to internal solvent resonances and were reported as parts per million relative to SiMe<sub>4</sub>.

### **Thermal Analysis**

Melting transition ( $T_m$ ) and cold crystallization ( $T_c$ ) temperatures were measured by differential scanning calorimetry (DSC) on an Auto Q20, TA Instrument. All  $T_m$  and  $T_g$  values were obtained from a second scan after the thermal history was removed from the first scan. The second heating rate was 10 °C/min and cooling rate was 10 °C/min unless indicated otherwise in the polymerization tables. Decomposition temperatures ( $T_d$ , defined by the temperature of 5 % weight loss) and maximum rate decomposition temperatures ( $T_{max}$ ) of the polymers were measured by thermal gravimetric analysis (TGA) on a Q50 TGA Analyzer, TA Instrument. Polymer samples were heated from ambient temperature to 700 °C at a heating rate of 10 °C/min. Values of  $T_{max}$  were obtained from derivative (wt %/°C) vs. temperature (°C) plots, while  $T_d$  and  $T_{onset}$  values (initial and end temperatures) were obtained from wt % vs. temperature (°C) plots.

### **Molecular Weight Measurements**

Measurements of polymer weight-average molecular weight ( $M_w$ ), number-average molecular weight ( $M_n$ ), and molecular weight distributions or dispersity indices ( $D = M_w/M_n$ ) were performed via gel-permeation chromatography (GPC). The GPC instrument consisted of an Agilent HPLC system equipped with one guard column and two PLgel 5 µm mixed-C gel permeation columns and coupled with a Wyatt DAWN HELEOS II multi (18)-angle light scattering detector and a Wyatt Optilab TrEX dRI detector; the analysis was performed at 40 °C using chloroform as the eluent at a flow rate of 1.0 mL/min, using Wyatt ASTRA 7.1.2 molecular weight characterization software.

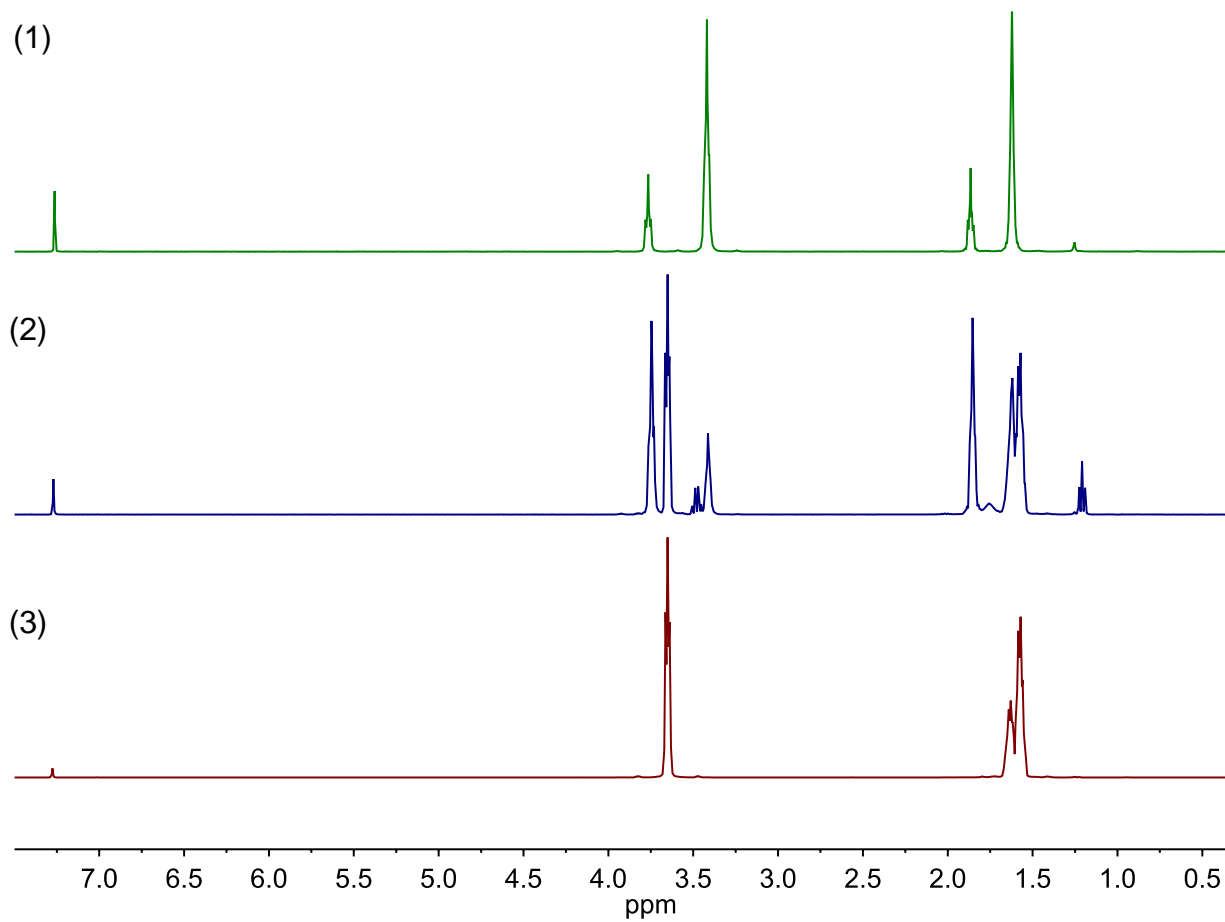

**Figure S2.** <sup>1</sup>H NMR (23 °C, CDCl<sub>3</sub>) spectra stack of: **(1)** THF polymerization catalyzed by CF<sub>3</sub>SO<sub>3</sub>H with [THF]/[THP]/[CF<sub>3</sub>SO<sub>3</sub>H] = 100/100/1 at 0 °C. **(2)** copolymerization of THF and THP catalyzed by BF<sub>3</sub>·Et<sub>2</sub>O with [THF]/[THP]/[BF<sub>3</sub>·Et<sub>2</sub>O] = 100/100/10 at 0 °C. **(3)** THP for reference.

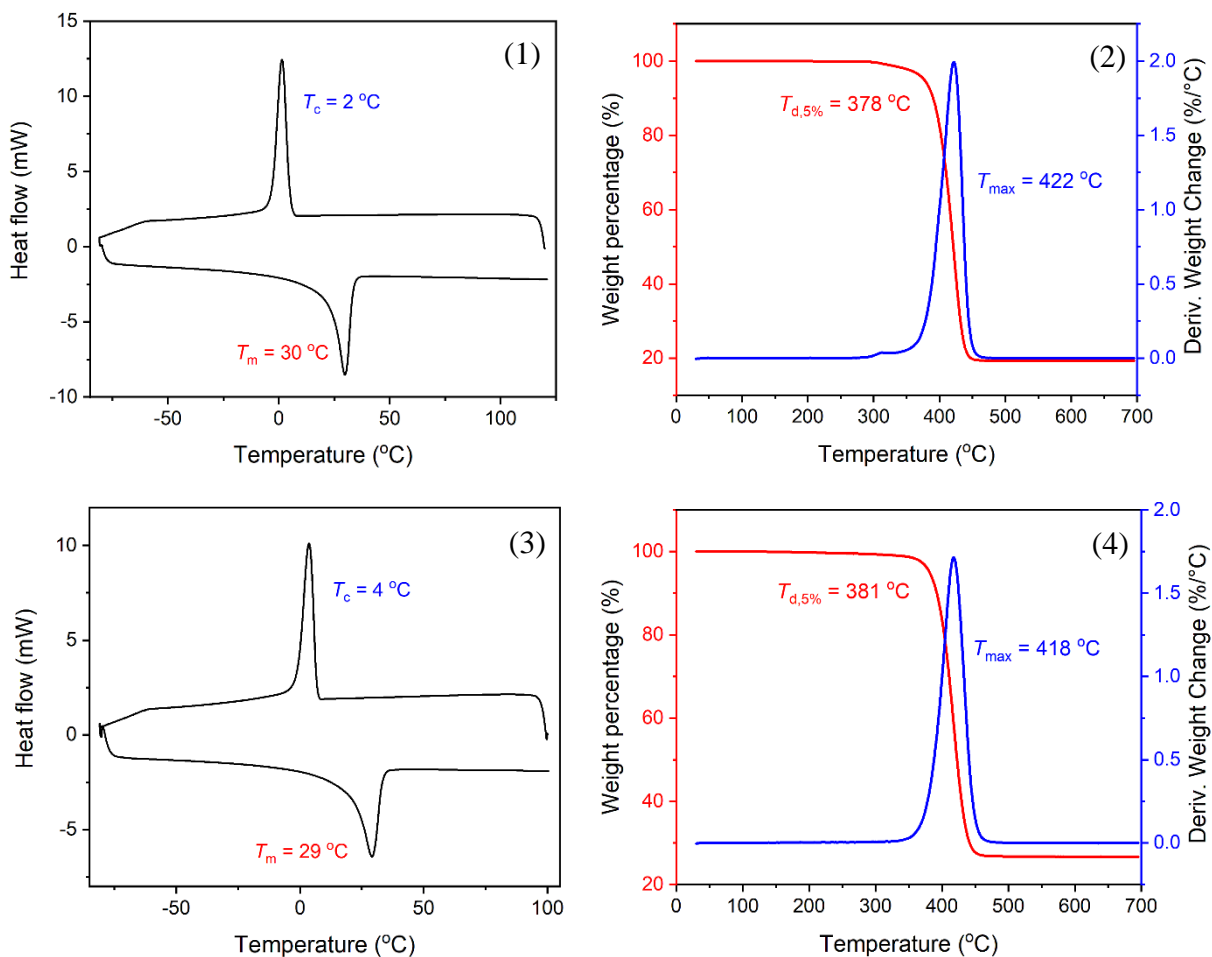

**Figure S3.** For poly(THF) produced by polymerization of THF: (1) DSC trace; (2) TGA and DTG curves. For poly(THF) produced by copolymerization of THF and THP: (3) DSC trace; (4) TGA and DTG curves.

**Technoeconomic analysis:**

**Table S1.** Temperature, pressure and mass flow of each stream based on the process flow diagram in **Figure 1**.

| <b>Stream</b>                   | <b>Temperature<br/>(°C)</b> | <b>Pressure<br/>(bar)</b> | <b>Total flow<br/>(kg/h)</b> | <b>H<sub>2</sub><br/>(kg/h)</b> | <b>DHP<br/>(kg/h)</b> | <b>THP<br/>(kg/h)</b> | <b>1-Pentanol<br/>(kg/h)</b> |
|---------------------------------|-----------------------------|---------------------------|------------------------------|---------------------------------|-----------------------|-----------------------|------------------------------|
| <b>1</b>                        | 27.92                       | 14.8                      | 2,069.78                     | -                               | 2,069.78              | -                     | -                            |
| <b>2</b>                        | 200                         | 14.8                      | 4,331.30                     | 1,683.77                        | 2,079.50              | 567.88                | 0.15                         |
| <b>3</b>                        | 200                         | 14                        | 4,331.30                     | 1,634.65                        | 43.02                 | 2,639.90              | 13.73                        |
| <b>4</b>                        | 25                          | 14                        | 2,230.25                     | 1,634.61                        | 10.02                 | 585.47                | 0.16                         |
| <b>5</b>                        | 36.63                       | 14.8                      | 2,163.31                     | 1,585.56                        | 9.72                  | 567.88                | 0.15                         |
| <b>6</b>                        | 498.92                      | 14.8                      | 98.21                        | 98.21                           | -                     | -                     | -                            |
| <b>7</b>                        | 200                         | 14.8                      | 2,261.52                     | 1,683.77                        | 9.72                  | 567.88                | 0.15                         |
| <b>H<sub>2</sub><br/>makeup</b> | 25                          | 1.01                      | 98.21                        | 98.21                           | -                     | -                     | -                            |
| <b>Purge</b>                    | 36.63                       | 14.8                      | 66.91                        | 49.04                           | 0.3                   | 17.56                 | 0                            |
| <b>DHP</b>                      | 25                          | 1                         | 2,069.78                     | -                               | 2,069.78              | -                     | -                            |
| <b>THP</b>                      | 25                          | 14                        | 2,101.05                     | 0.05                            | 33                    | 2,054.43              | 13.57                        |

**Table S2.** Economic parameters and assumptions.<sup>1</sup>

|                                              |                         |
|----------------------------------------------|-------------------------|
| Plant operating hours per year (hours/year)  | 7880                    |
| Plant life (year)                            | 30                      |
| Internal rate of return (%)                  | 10                      |
| Plant depreciation (year)                    | 7                       |
| Loan terms                                   | 10 years loan at 8% APR |
| Construction time (year)                     | 3                       |
| First 12 months' expenditure                 | 8                       |
| Next 12 months' expenditure                  | 60                      |
| Last 12 months' expenditure                  | 32                      |
| Federal tax rate (%)                         | 21                      |
| Financing (% of equity)                      | 40                      |
| Start-up time (month)                        | 6                       |
| Revenue during start-up (%)                  | 50                      |
| Variable operating costs during start-up (%) | 75                      |
| Fixed operating costs during start-up (%)    | 100                     |
| <b>Variable operating cost</b>               |                         |
| Electricity purchase (\$/kWh)                | 0.07                    |
| Hydrogen purchase (\$/ton)                   | 1507                    |
| 30 wt% Ni/SiO <sub>2</sub> <sup>a</sup>      | 185.4                   |
| Steam purchase (\$/kJ)                       | $2.50 \times 10^{-6}$   |
| Cooling water purchase (\$/kJ)               | $2.12 \times 10^{-7}$   |
| <b>Fixed operating cost</b>                  |                         |
| Labor costs <sup>b</sup>                     | \$75,000                |
| Annual maintenances                          | 3.0% of ISBL            |
| Property insurances                          | 0.7% of FCI             |

<sup>a</sup>We assumed that catalyst was refurbished after every 3 months at 20% of the initial catalyst cost.<sup>2</sup>

<sup>b</sup>We assumed that the DHP production process can be operated by one full-time operator.

**Table S3.** Summary of capital costs of the THP production process at a DHP feed rate of 16,300 ton per year.

| <b>Cost components</b>                       |                | <b>Cost (1,000\$)</b> |
|----------------------------------------------|----------------|-----------------------|
| Inside-battery-limits (ISBL) equipment cost  |                | 8,698                 |
| Outside-battery-limits (ISBL) equipment cost | 40.0% of ISBL  | 3,479                 |
| Warehouse                                    | 4.0% of ISBL   | 348                   |
| Site development                             | 9.0% of ISBL   | 783                   |
| Additional piping                            | 4.5% of ISBL   | 391                   |
| <b>Total direct costs (TDC)</b>              |                | <b>13,700</b>         |
| Prorateable expenses                         | 10.0% of TDC   | 1,370                 |
| Field expenses                               | 10.0% of TDC   | 1,370                 |
| Home office and construction fee             | 20.0% of TDC   | 2,740                 |
| Project contingency                          | 40.0% of TDC   | 5,480                 |
| Other costs (start-up, Permits, etc.)        | 10.0% of TDC   | 1,370                 |
| <b>Total indirect costs (TIC)</b>            |                | <b>12,330</b>         |
| <b>Fixed capital investment (FCI)</b>        | <b>TDC+TIC</b> | <b>26,030</b>         |
| Land and working capital                     | 5.0% of FCI    | 1,302                 |
| <b>Total capital investment (TCI)</b>        |                | <b>27,332</b>         |

**Table S4.** Summary of operating costs of the THP production process at a DHP feed rate of 16,300 ton per year.

| <b>Cost components</b>          | <b>Cost (\$/year)</b> |
|---------------------------------|-----------------------|
| Cooling water                   | 19,029                |
| Steam                           | 24,903                |
| Electricity                     | 209,845               |
| DHP feed stock                  | 24,467,400            |
| Hydrogen                        | 1,166,650             |
| Catalyst                        | 6,674                 |
| <b>Variable operating costs</b> | <b>25,894,500</b>     |
| Labor costs                     | 75,000                |
| Annual maintenance              | 260,953               |
| Property insurance              | 182,211               |
| <b>Fixed operating costs</b>    | <b>518,164</b>        |

## Computational modeling

### MD simulation setup

Atomistic MD simulations were performed in the isothermal-isobaric ensemble using *Gromacs 2016*.<sup>3</sup> The simulation contains 1 LDPE oligomer ( $C_{40}H_{82}$ ) and 216 solvent (THP or water) molecules. All molecules were parameterized using Antechamber and the Generalized AMBER force fields.<sup>4,5</sup> The simulation system was initialized with a cubic box containing a single polymer. The system was then solvated, energy minimized, and equilibrated for 20 ns in an *NPT* simulation at 300 K and 1 bar using a velocity-rescale thermostat and Berendsen barostat. A 100 ns *NPT* simulation was then performed at the same temperature and pressure using the Nose-Hoover thermostat and Parrinello-Rahman barostat. All simulations were performed using a leapfrog integrator with a 2-fs timestep. Verlet lists were generated using a 1.2 nm neighbor list cutoff. Van der Waals interactions were modeled with a shifted Lennard-Jones potential and Verlet cutoff-scheme that was smoothly shifted to zero at 1.2 nm. Electrostatic interactions were calculated using the smooth Particle Mesh Ewald method with a short-range cutoff of 1.2 nm, grid spacing of 0.14 nm, and 4<sup>th</sup> order interpolation. Bonds were constrained using the LINCS algorithm. All thermostats used a 2.0 ps time constant and all barostats used a 2.0 ps time constant with an isothermal compressibility of  $3.0 \times 10^{-5} \text{ bar}^{-1}$ .

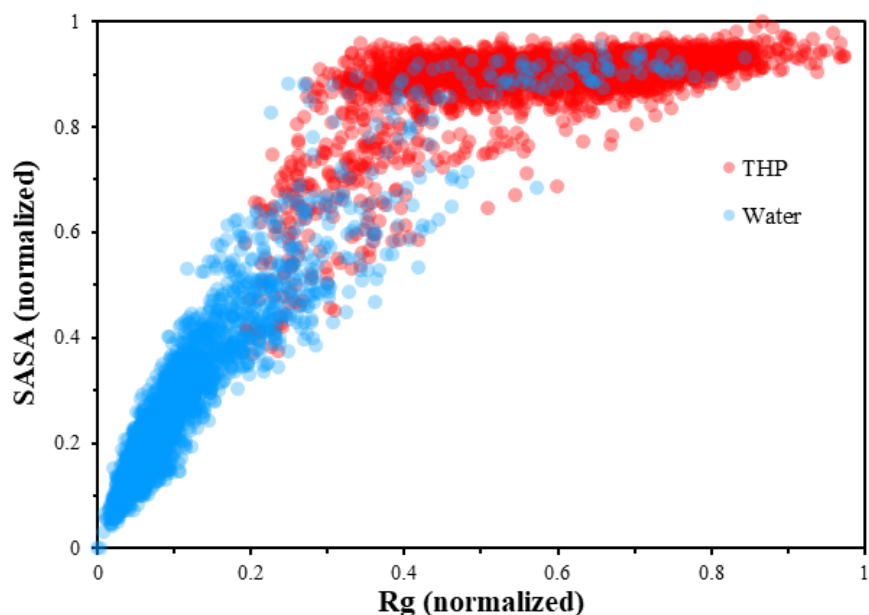

**Figure S4.**  $R_g$ -SASA scatter plot of LDPE oligomer in THP and water.  $R_g$  and SASA were calculated from MD simulations.



## References:

1. Chang, H.; Bajaj, I.; Huber, G. W.; Maravelias, C. T.; Dumesic, J. A., Catalytic strategy for conversion of fructose to organic dyes, polymers, and liquid fuels. *Green Chemistry* **2020**, *22* (16), 5285-5295.
2. CatCost V1.1.0 : Cost Estimation Tool for Pre-Commercial Catalysts.  
<https://catcost.chemcatbio.org/>.
3. Abraham, M. J.; Murtola, T.; Schulz, R.; Páll, S.; Smith, J. C.; Hess, B.; Lindahl, E., GROMACS: High performance molecular simulations through multi-level parallelism from laptops to supercomputers. *SoftwareX* **2015**, *1*, 19-25.
4. Wang, J.; Wang, W.; Kollman, P. A.; Case, D. A., Automatic atom type and bond type perception in molecular mechanical calculations. *J. Mol. Graphics Modell.* **2006**, *25* (2), 247-260.
5. Wang, J.; Wolf, R. M.; Caldwell, J. W.; Kollman, P. A.; Case, D. A., Development and testing of a general amber force field. *J. Comput. Chem.* **2004**, *25* (9), 1157-1174.
